# Supplementary material for: LTBP2 inhibits prostate cancer progression and metastasis via the PI3K/AKT signaling pathway
Source: PubMed Central journal article supplement — Exp Ther Med. 2022 Jul 8;24(3):563. doi: 10.3892/etm.2022.11500 (PMC9400130; doi:10.3892/etm.2022.11500), 2022-07-08
Supplement: Supplementary_Data2.pdf [file Supplementary_Data2.pdf]

Table SI. Characteristics of the included datasets.

| Dataset ID | GPL ID   | Total samples | Tumor | Control |
|------------|----------|---------------|-------|---------|
| GSE46602   | GPL570   | 50            | 36    | 14      |
| GSE70768   | GPL10558 | 186           | 113   | 73      |
| GSE116918  | GPL25318 | 248           | 248   | -       |
| GSE70769   | GPL10558 | 94            | 94    | -       |
| TCGA-PRAD  | -        | 540           | 51    | 489     |
| GSE78220   | GPL11154 | 27            | 27    | -       |
| IMvigor210 | -        | 298           | 298   | -       |

TCGA, The Cancer Genome Atlas; PRAD, prostate adenocarcinoma.

Table SII. List of antibodies.

| Name                           | Company                         | Catalogue nos. |
|--------------------------------|---------------------------------|----------------|
| p-PI3K                         | Cell Signaling Technology, Inc. | 17366S         |
| PI3K                           | ProteinTech Group, Inc.         | 20584-1-AP     |
| p-AKT                          | ProteinTech Group, Inc.         | 66444-1-Ig     |
| AKT                            | ProteinTech Group, Inc.         | 60203-2-Ig     |
| LTBP2                          | Abcam                           | ab158832       |
| GAPDH                          | Abcam                           | ab8245         |
| Goat Anti-Rabbit IgG H&L (HRP) | Abcam                           | ab6721         |

p-, phosphorylated; LTBP2, latent transforming growth factor  $\beta$ -binding protein 2.

Table SIII. Correlation between LTBP2 expression with immune-cell marker genes.

| Gene  | Immune cells             | Biomarker | Correlation | P-value             |
|-------|--------------------------|-----------|-------------|---------------------|
| LTBP2 | B cells                  | CD19      | 0.256066035 | <0.001              |
| LTBP2 | B cells                  | CD79A     | 0.300137142 | <0.001              |
| LTBP2 | CD8 <sup>+</sup> T cells | CD8A      | 0.45089881  | <0.001              |
| LTBP2 | CD8 <sup>+</sup> T cells | CD8B      | 0.246745346 | <0.001              |
| LTBP2 | CD4 <sup>+</sup> T cells | CD4       | 0.665388512 | <0.001              |
| LTBP2 | M1 macrophages           | NOS2      | 0.289922592 | <0.001              |
| LTBP2 | M1 macrophages           | IRF5      | 0.460371442 | <0.001              |
| LTBP2 | M1 macrophages           | PTGS2     | 0.312092716 | <0.001              |
| LTBP2 | M2 macrophages           | CD163     | 0.539329454 | <0.001              |
| LTBP2 | M2 macrophages           | VSIG4     | 0.641037738 | <0.001              |
| LTBP2 | M2 macrophages           | MS4A4A    | 0.5545801   | <0.001              |
| LTBP2 | Neutrophils              | CEACAM8   | 0.030410405 | 0.4979 <sup>a</sup> |
| LTBP2 | Neutrophils              | ITGAM     | 0.702792959 | <0.001              |
| LTBP2 | Neutrophils              | CCR7      | 0.423993143 | <0.001              |
| LTBP2 | Dendritic cells          | HLA-DPB1  | 0.521451385 | <0.001              |
| LTBP2 | Dendritic cells          | HLA-DQB1  | 0.459882077 | <0.001              |
| LTBP2 | Dendritic cells          | HLA-DRA   | 0.601806118 | <0.001              |
| LTBP2 | Dendritic cells          | HLA-DPA1  | 0.624114832 | <0.001              |
| LTBP2 | Dendritic cells          | CD1C      | 0.529686084 | <0.001              |
| LTBP2 | Dendritic cells          | NRP1      | 0.335062607 | <0.001              |
| LTBP2 | Dendritic cells          | ITGAX     | 0.536509742 | <0.001              |

<sup>a</sup>P>0.05. LTBP2, latent transforming growth factor  $\beta$ -binding protein 2.
